# Supplementary material
Source: Research Square preprint supplement (doi:10.21203/rs.3.rs-9032551/v1)
Supplement: Supplementary file 1 [file 290696079b0bbfaa39374a6f.docx]

| HGNC ID | Symbol |
| --- | --- |
| HGNC:10120 | RNU1-1 |
| HGNC:10123 | RNU1-2 |
| HGNC:10130 | RNU1-3 |
| HGNC:10128 | RNU1-4 |
| HGNC:10142 | RNU2-1 |
| HGNC:10192 | RNU4-1 |
| HGNC:10193 | RNU4-2 |
| HGNC:10211 | RNU5A-1 |
| HGNC:10212 | RNU5B-1 |
| HGNC:10214 | RNU5D-1 |
| HGNC:10215 | RNU5E-1 |
| HGNC:10216 | RNU5F-1 |
| HGNC:10227 | RNU6-1 |
| HGNC:34270 | RNU6-2 |
| HGNC:34284 | RNU6-7 |
| HGNC:34285 | RNU6-8 |
| HGNC:34269 | RNU6-9 |
| HGNC:34033 | RNU7-1 |
| HGNC:10133 | RNVU1-1 |
| HGNC:48308 | RNVU1-2 |
| HGNC:54430 | RNVU1-2A |
| HGNC:48311 | RNVU1-3 |
| HGNC:48312 | RNVU1-4 |
| HGNC:48314 | RNVU1-6 |
| HGNC:37500 | RNVU1-7 |
| HGNC:48315 | RNVU1-8 |
| HGNC:48319 | RNVU1-14 |
| HGNC:48320 | RNVU1-15 |
| HGNC:48322 | RNVU1-17 |
| HGNC:37496 | RNVU1-18 |
| HGNC:48324 | RNVU1-19 |
| HGNC:48325 | RNVU1-20 |
| HGNC:48464 | RNVU1-21 |
| HGNC:48462 | RNVU1-22 |
| HGNC:48434 | RNVU1-23 |
| HGNC:48401 | RNVU1-24 |
| HGNC:54428 | RNVU1-25 |
| HGNC:54429 | RNVU1-26 |
| HGNC:54431 | RNVU1-27 |
| HGNC:54432 | RNVU1-28 |
| HGNC:54433 | RNVU1-29 |
| HGNC:54434 | RNVU1-30 |
| HGNC:54448 | RNVU1-31 |
| HGNC:48448 | RNVU1-32 |
| HGNC:48429 | RNVU1-33 |
| HGNC:48427 | RNVU1-34 |

Supplementary Table 1: Spliceosomal snRNA genes
